# Supplementary material for: Ternary solvent based homogeneous liquid–liquid microextraction for the preconcentration of organochlorine pesticides from water and apple juice samples
Source: Royal Society of Chemistry journal article supplement (doi:10.1039/d3ay01751f), 2023-11-21
Supplement: d3ay01751f1.pdf [file d3ay01751f1.pdf]

**TABLE S1.** Molar mass, quantitative ion, qualifier ions and retention time's ions selected for the analysis of OCPs using GC-MS analysis

| Analytes            | MW (g/mol) | RT (min) | quantitative (precursor ion)(m/z) | qualitative ions (product ions) (m/z) |
|---------------------|------------|----------|-----------------------------------|---------------------------------------|
| $\alpha$ -BHC       | 290.83     | 7.87     | 219                               | 189, 109                              |
| $\beta$ -BHC        | 290.83     | 9.52     | 219                               | 189, 109                              |
| $\delta$ -BHC       | 290.83     | 10.08    | 219                               | 189, 109                              |
| Aldrin              | 364.9      | 11.78    | 263                               | 66, 293                               |
| HCE                 | 389.3      | 13.88    | 263                               | 81, 353                               |
| $\gamma$ -chlordane | 409.8      | 15.19    | 272                               | 65, 373                               |
| 4,4-DDE             | 318.02     | 17.38    | 246                               | 176, 318                              |
| Endrin              | 380.90     | 18.74    | 281                               | 263, 345                              |
| P,p-DDT             | 354.49     | 19.25    | 212                               | 165, 235                              |
| ESS                 | 422.9      | 21.87    | 272                               | 229, 387                              |
| Dieldrin            | 380.91     | 23.28    | 280                               | 249, 379                              |
| MC                  | 345.65     | 24.88    | 240                               | 227, 274                              |
| DBC                 | 499        | 25.25    | 237                               | 99, 388                               |

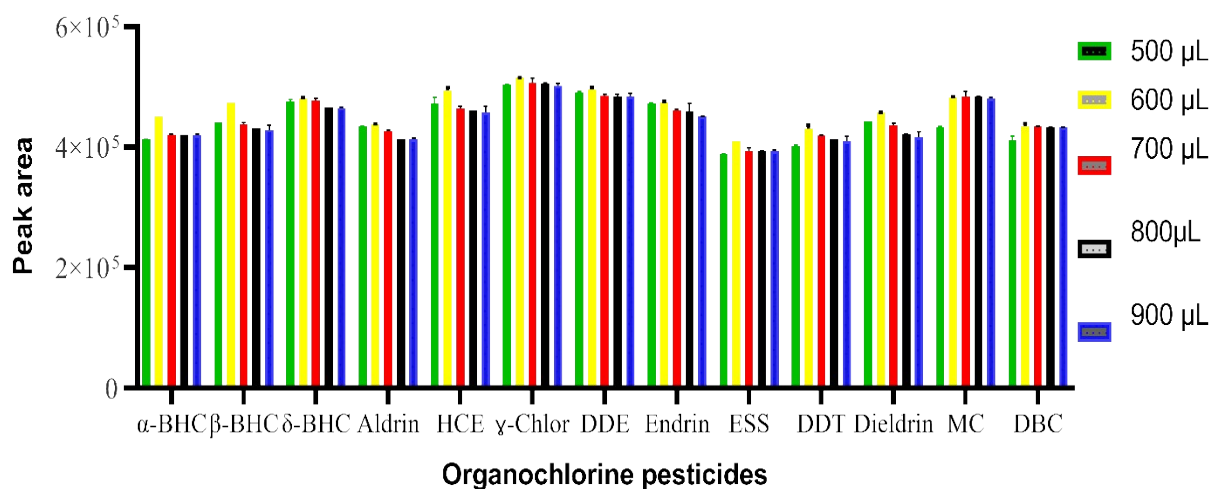

**Figure S1.** Selection of total volume of extraction solvent. Extraction conditions; Sample volume 5mL, mixed standard 5 ng/mL, extraction solvent volume ratio 2:1, the mass of NaCl: 1.5 g, centrifugation at 4000 rpm for 2 min

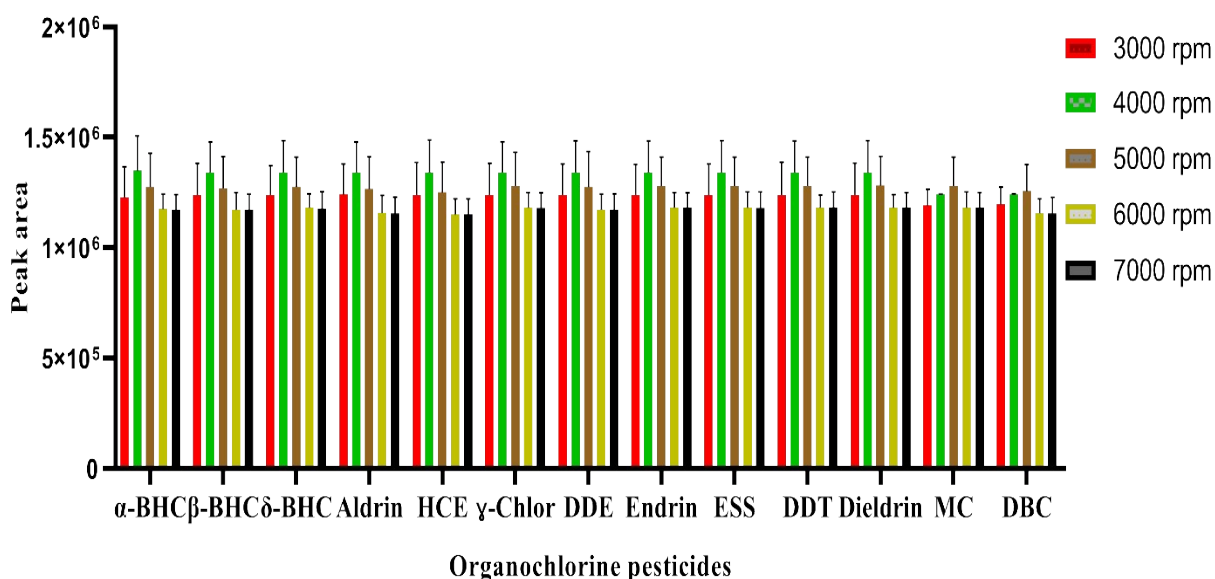

**Figure S2.** Effect of centrifugation rate on the extraction efficiency of the proposed method. Extraction conditions; Sample volume 5 mL, mixed standard 5 ng/mL, extraction solvent (volume) ACN:EA (600  $\mu$ L), extraction solvent volume ratio 3:1, mass of NaCl 1.5 g, centrifugation time 2

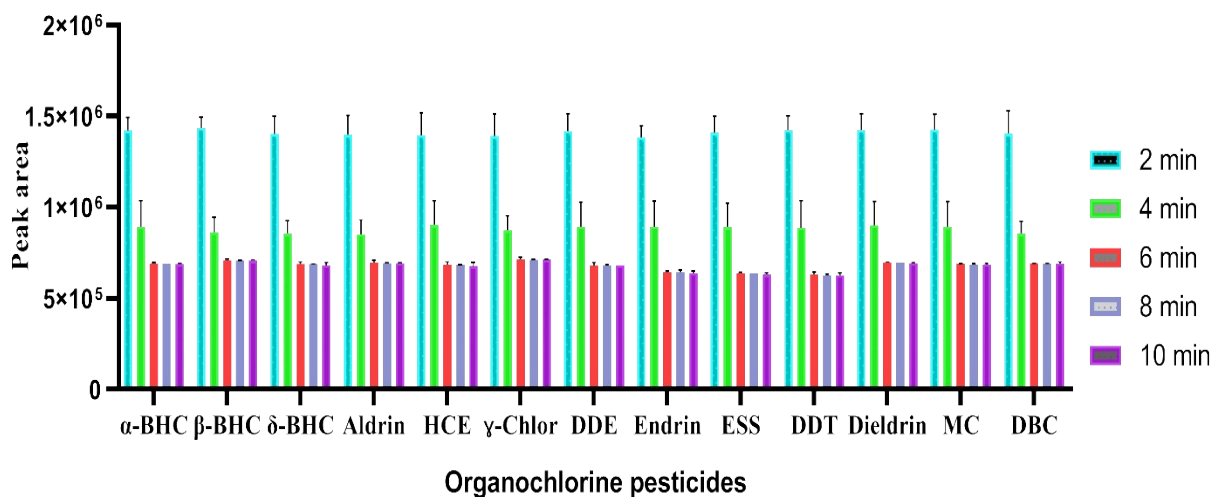

min

**Figure S3.** Effect of centrifugation time on the extraction efficiency of the proposed method. Extraction conditions; Sample volume 5 mL, mixed standard 5 ng/mL, extraction solvent (volume)

ACN: EA (600 $\mu$ L), extraction solvent volume ratio 3:1, mass of NaCl 1.5 g, centrifugation rate 4000 rpm

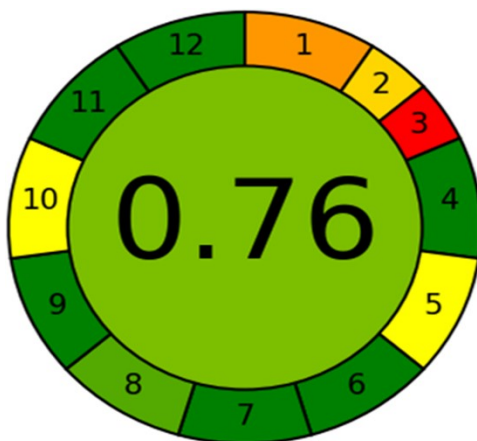

**Figure S4.** AGREE prep assessment result of this study

Note that numbers 1-12 indicated the 12 principles of GAC as mentioned below

**Principle 1.** Direct analytical techniques should be applied to avoid sample treatment.

**Principle 2.** Minimal sample size and minimal number of samples are goal

**Principle 3.** In situ measurements should be performed

**Principle 4.** Integration of analytical processes and operations saves energy and reduces the use of reagents.

**Principle 5.** Automated and miniaturized methods should be selected.

**Principle 6.** Derivatization should be avoided.

**Principle 7.** Generation of a large volume of analytical waste should be avoided and proper management of analytical waste should be provided

**Principle 8.** Multi-analyte or multi-parameter methods are preferred versus methods using one analyte at a time.

**Principle 9.** The use of energy should be minimized

**Principle 10.** Reagents obtained from renewable source should be preferred

**Principle 11.** Toxic reagents should be eliminated or replaced.

**Principle 12.** The safety of the operator should be increased
